# Supplementary material
Source: PubMed Central journal article supplement (PMC6250587)
Supplement: NIHMS1500930-supplement-1.pdf [file NIHMS1500930-supplement-1.pdf]

**A**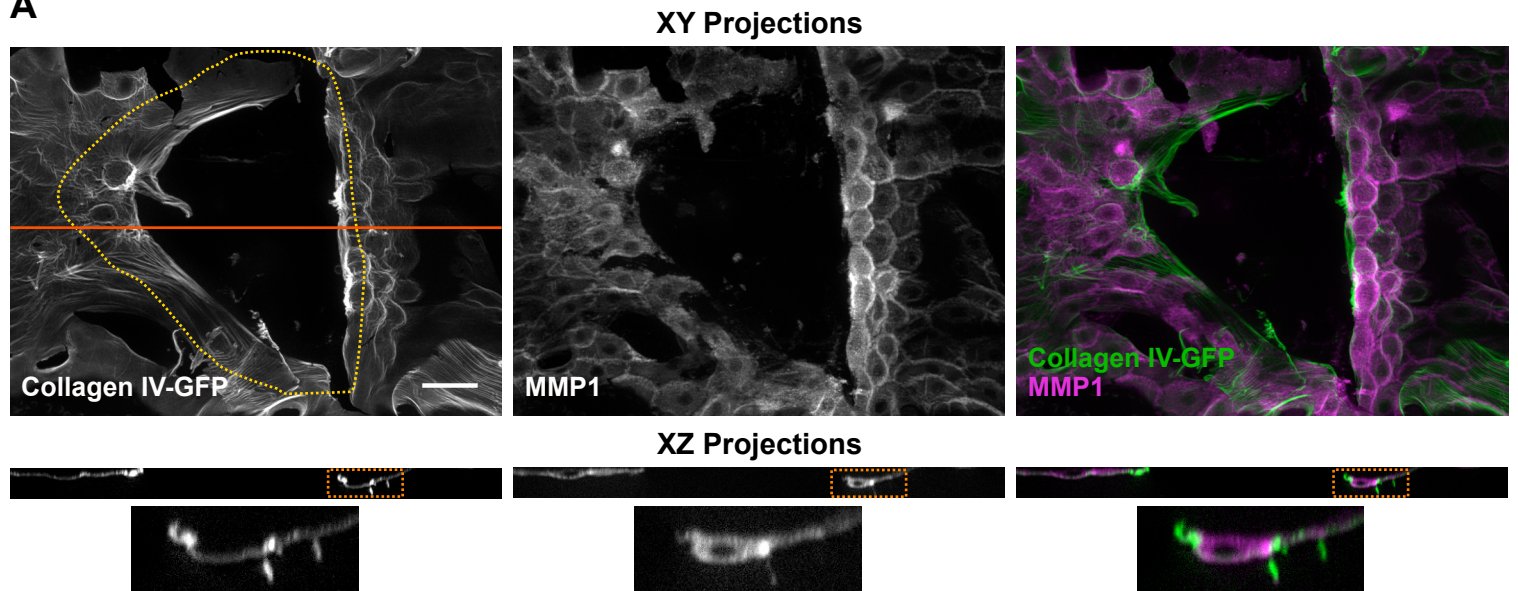**B**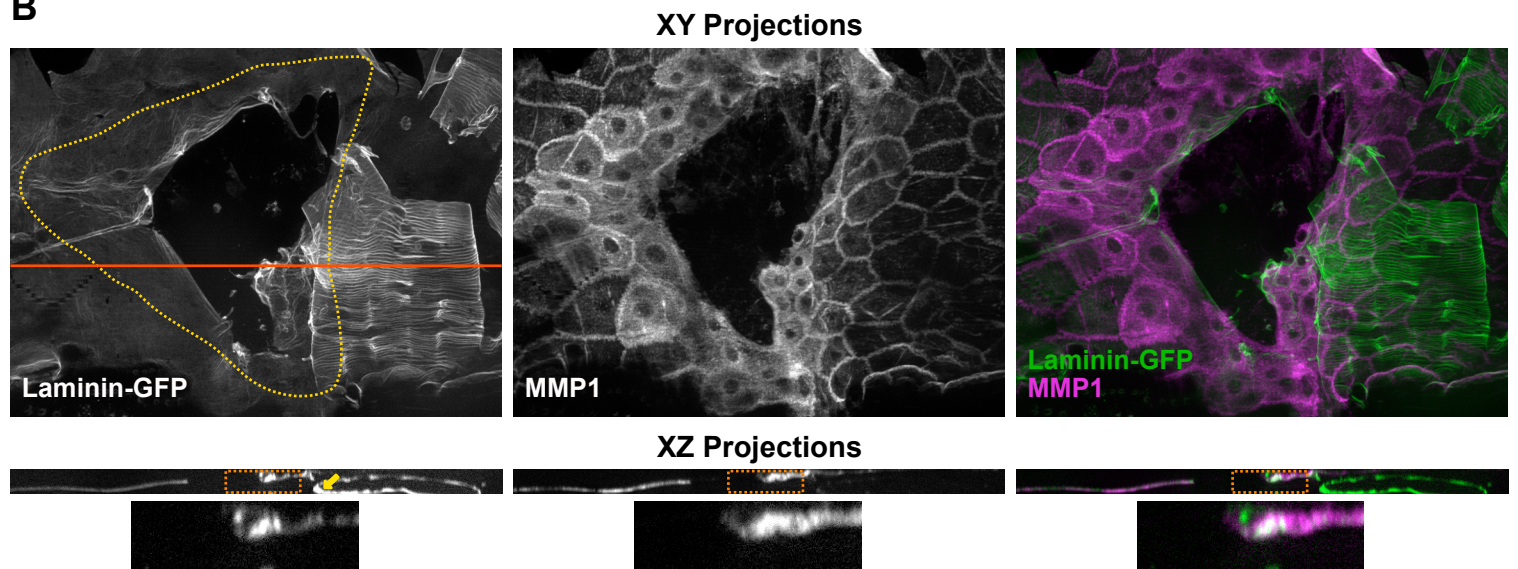

**Supplemental Figure 1: The damage in basement membrane mirrors associated cell damage.**

Basement membrane damage 2 h post wounding has similar dimensions to the overlying cell damage, as seen with collagen IV (A) or laminin (B). Yellow dotted lines indicate wound borders and orange solid lines indicate sections sampled for XZ projections. Orange dotted boxes indicate region of XZ projections that are magnified. Yellow arrow in Laminin-GFP XZ projection indicates muscle basement membrane. Scale bar, 50  $\mu$ m.
