# Supplementary material
Source: PubMed Central journal article supplement (PMC6250587)
Supplement: NIHMS1500930-supplement-3.pdf [file NIHMS1500930-supplement-3.pdf]

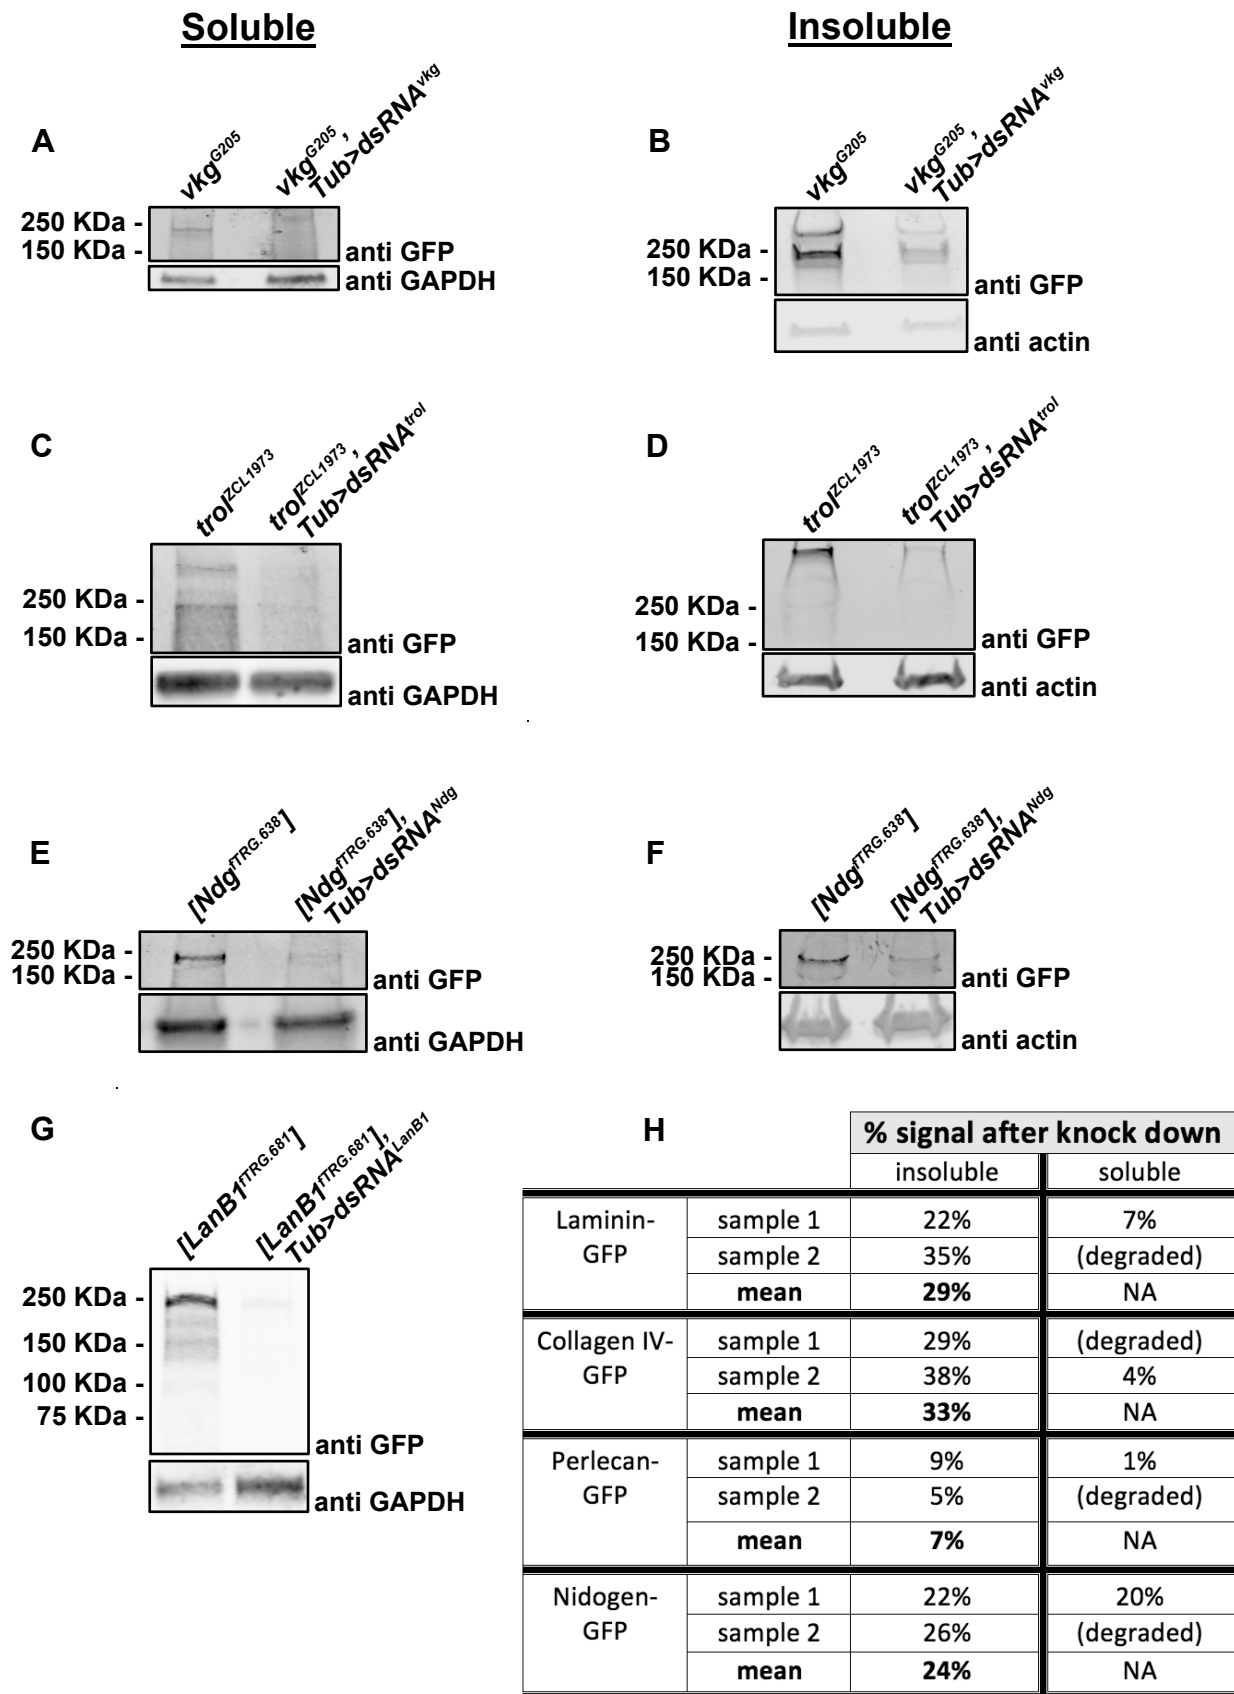

**Supplemental Figure 3: Collagen IV, Perlecan, Nidogen, and Laminin can be depleted by RNA interference.** **A-B)** Collagen IV (*Vkg*-GFP) is knocked down after expression of dsRNA against *vkg*. **C-D)** Perlecan (*TroI*-GFP) is knocked down after expression of dsRNA against *troI*. **E-F)** Nidogen (*Ndg*-GFP) is knocked down after expression of dsRNA against *Ndg*. Both nidogen blots were imaged together and thus are directly comparable. **G)** Laminin (*LanB1*-GFP) is knocked down after expression of dsRNA against *LanB1*. For insoluble *LanB1*-GFP, see Fig. 7C. Panel G and 7C were imaged at the same time and thus are directly comparable. **H)** Quantification of the extent of knockdown in all western blots.
