# Supplementary material
Source: PubMed Central journal article supplement (PMC6250587)

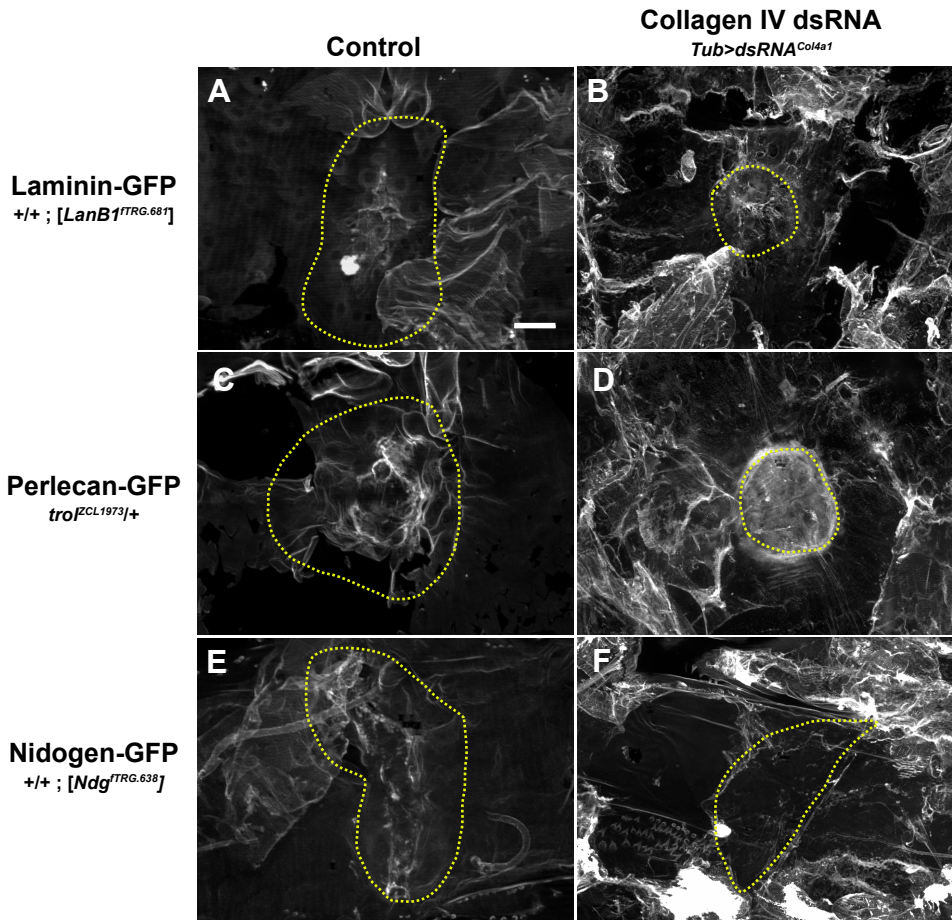

**Supplemental Figure 4: Secondary dsRNA lines.**

**A-F)** Knocking down expression of *Col4a1* has a similar effect on the repair of other basement membrane proteins as knocking down *vkg*. In both collagen knockdown conditions, Laminin-GFP and Nidogen-GFP form scars in the repaired region whereas perlecan is deposited more uniformly within the repaired wound. See Fig. 6 for quantification.

**G-H)** Nidogen deposition into the repaired basement membrane is decreased in the absence of laminin when using a different dsRNA line against the *LanB1* gene. See Fig. 6 for quantification.

Yellow dotted line indicates wound borders. Scale bar, 50  $\mu$ m. All wounds were imaged 24 h after wounding.

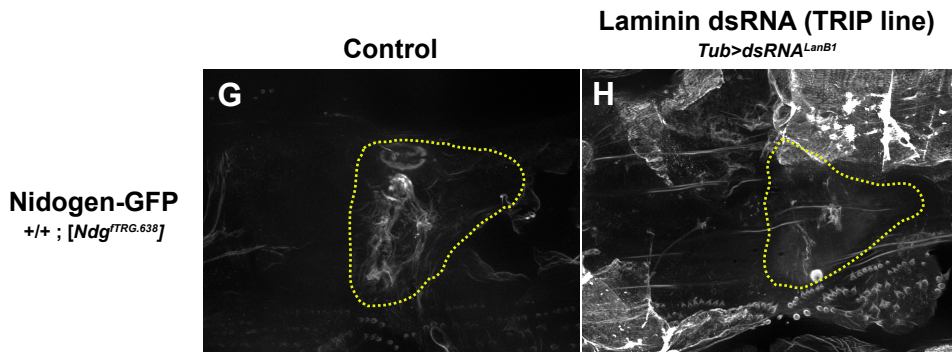

Supplement: NIHMS1500930-supplement-4.pdf [file NIHMS1500930-supplement-4.pdf]
